# Supplementary material for: Eye movements are coordinated with pectoral fin beats during locomotion in a marine teleost fish
Source: Oxford University Press journal article supplement (doi:10.1242/jeb.116756), 2015-01-01
Supplement: jeb116756supp.pdf [file jeb116756supp.pdf]

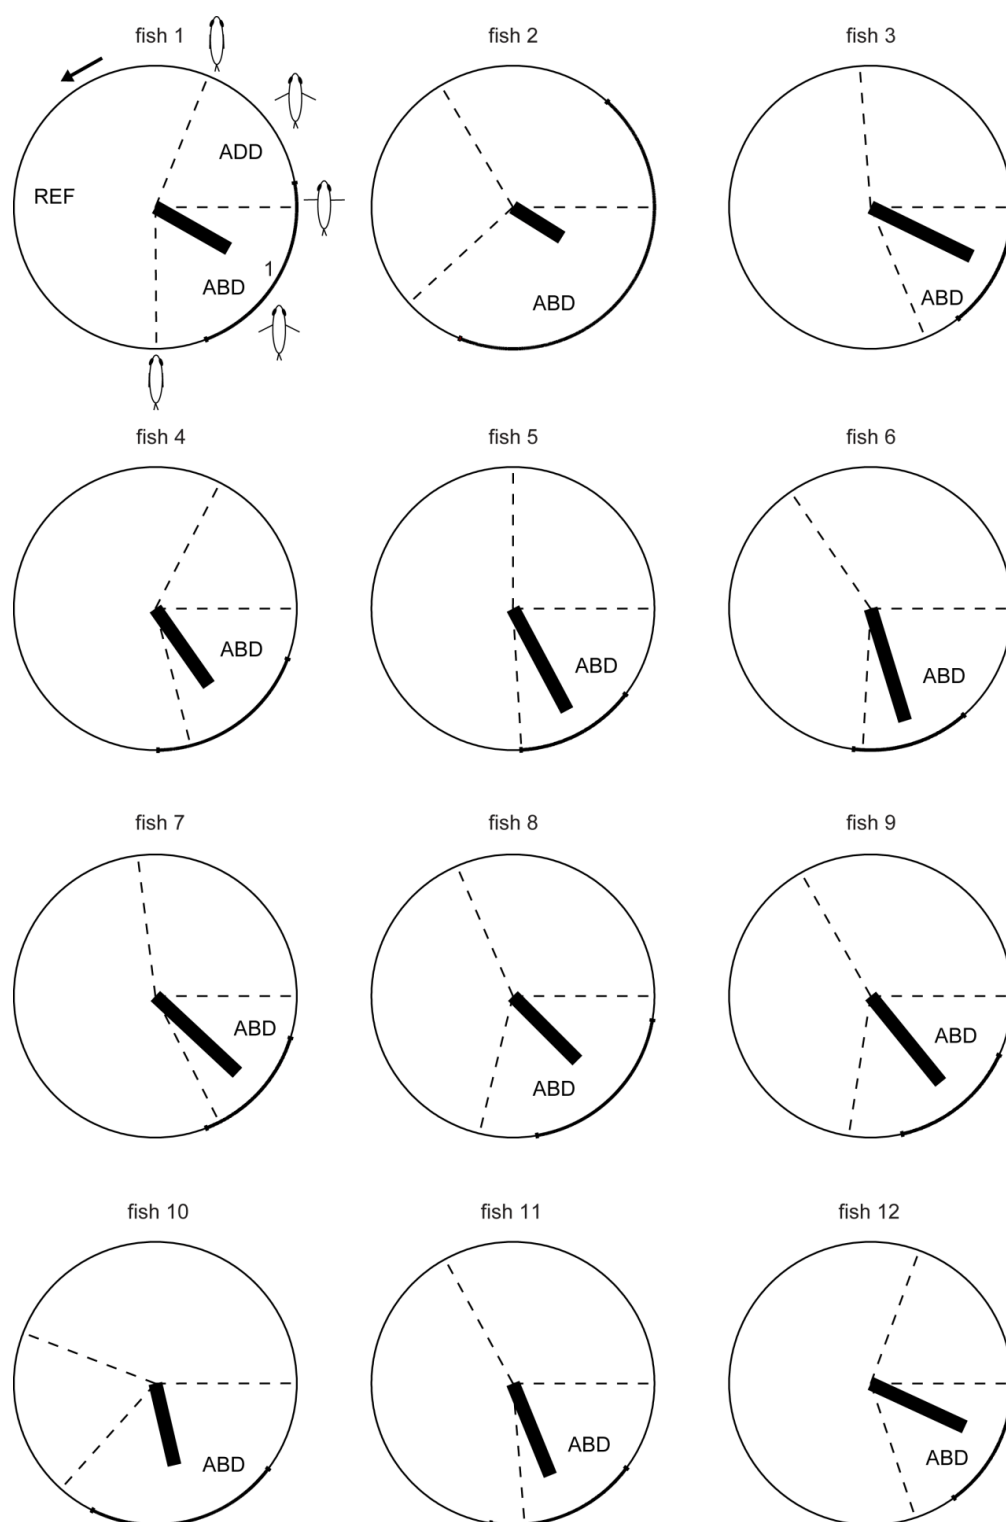

**Fig. S1. Mean vector circular plots for all individuals.** Saccades occur primarily during pectoral fin abduction. In each of the 12 individuals, the mean vector  $R$  (black bar) points in the direction around which the saccades are concentrated ( $N=12$ ); the length of  $R$  represents the degree of concentration of saccades on a scale of 0 to 1. The bold arc along each plot's circumference is the 95% confidence interval around the mean-vector direction. Time begins arbitrarily at fin adduction at (1,0) and moves counterclockwise, as shown by the small arrow. Fish diagrams illustrate approximate fin positions. ABD, abduction; ADD, adduction; REF, refractory phase.

**Table S1.** Results of circular statistics for each of the 12 individuals and across individuals (grand mean).

| fish                                              | <i>N</i> | <i>R</i> | <i>P</i>    |
|---------------------------------------------------|----------|----------|-------------|
| <i>individual means</i>                           |          |          |             |
| 1                                                 | 12       | 0.596    | 0.011 *     |
| 2                                                 | 12       | 0.406    | 0.139 NS    |
| 3                                                 | 12       | 0.793    | < 0.001 *** |
| 4                                                 | 12       | 0.659    | 0.003 **    |
| 5                                                 | 12       | 0.815    | < 0.001 *** |
| 6                                                 | 12       | 0.830    | < 0.001 *** |
| 7                                                 | 12       | 0.794    | < 0.001 *** |
| 8                                                 | 12       | 0.645    | 0.005 **    |
| 9                                                 | 12       | 0.786    | < 0.001 *** |
| 10                                                | 12       | 0.594    | 0.012 *     |
| 11                                                | 12       | 0.701    | 0.001 **    |
| 12                                                | 12       | 0.732    | < 0.001 *** |
| <i>grand mean</i>                                 |          |          |             |
| all                                               | 12       | 1.000    | < 0.001 *** |
| *, $P < 0.05$ ; **, $P < 0.01$ ; ***, $P < 0.001$ |          |          |             |
